# Supplementary material
Source: publisher site journal article supplement (https://www.dovepress.com/article/477499)
Supplement: Supplementary file 1 [file get_supplementary_file.php]

**Supplementary Table 1** Summary of studies on LA-LVAs/LVZs and their clinical impact over the last 5 years

| Study | Year | Study  Design | Sample Size | Methodology | Key Findings | Positive/Negative |
| --- | --- | --- | --- | --- | --- | --- |
| Masuda M, et al.3 | 2018 | Prospective observational study | 147 patients with AF | Electroanatomical mapping + Follow-up for 12 months | LA-LVAs associated with higher recurrence rates after the RF catheter  ablation procedure. | Positive |
| Wang XH, et al.50 | 2018 | Prospective study | 150 patients with AF | Electroanatomical mapping + Follow-up for 12 months | LVA grade was an independent predictor for AF recurrence following CPVI. | Positive |
| Efremidis M, et al.51 | 2019 | Prospective study | 140 patients with AF | Electroanatomical mapping + Follow-up for 21.1 ± 0.8 months | Ablation of PVAI and specific electrograms in low-voltage areas can lead to encouraging outcomes with a low recurrence rate as well as a lower need for redo procedures. | Positive |
| Hori Y, et al.52 | 2019 | Retrospective observational study | 146 persistent AF patients | Electroanatomical mapping | In persistent AF patients, an LVZ on the LA anterior wall was associated with a low LAAFV. In addition, an anterior-LVZ located near the LAA orifice was further related to a reduction in the LAAFV. | Positive |
| Seewöster T, et al.32 | 2019 | Retrospective observational study | 211 patients with AF | Electroanatomical mapping | LVA and persistent AF are associated with worse total atrial emptying fraction. | Positive |
| Nery PB, et al.53 | 2020 | Retrospective observational study | 145 patients with AF | Electroanatomical mapping + Follow-up for 12 months | PVI combined with LVA ablation is associated with improved outcomes. | Positive |
| Liu Z, et al.54 | 2021 | Retrospective observational study | 126 patients with AF | Electroanatomical mapping | The associations between LVZ with AF initiation, perpetuation, and  termination were different depending on its size and distribution. | Positive |
| Schade A, et al.55 | 2021 | Retrospective observational study | 119 patients with AF | Electroanatomical mapping + Follow-up for 12 months | The existence of LVZ was the strongest predictor of ablation success. | Positive |
| Kumagai K, et al.56 | 2021 | Prospective study | 66 nonparoxysmal AF patients | Electroanatomical mapping + Follow-up for 11.6 ± 0.8 months | The predictor of atrial tachyarrhythmia recurrence after the PVI was LVAs. | Positive |
| Kurata N, et al.57 | 2022 | Retrospective observational study | 405 patients with AF | Electroanatomic mapping + follow-up for 12 months | LA-LVAs associated with higher recurrence rates. | Positive |
| Schram-Serban C, et al.58 | 2022 | Retrospective observational study | 430 patients with AF | Epicardial high-resolution mapping | Obesity may predispose to an overall decrease in atrial voltage and a higher percentage in low-voltage potentials. | Positive |
| Kuo MJ, et al.59 | 2022 | Retrospective observational study | 50 paroxysmal AF patients | Omnipolar Vmax, bipolar HD wave map, conventional  bipolar electrograms + Follow-up of 11.4 ± 5.4 months | LVZ detected by omnipolar Vmax map accurately predicts the AF recurrence following ablation in paroxysmal AF. | Positive |
| Kanda T, et al.60 | 2022 | Retrospective analysis | 711 patients with AF | Electroanatomical mapping + Follow-up for 2 years | LA-LVAs associated with higher recurrence rates after the RF catheter  ablation procedure. | Positive |
| Wu Y, et al.61 | 2022 | Retrospective study | 148 patients with AF | Electroanatomical mapping + Follow-up for 21 months | LA roof LVZ may increase the risk of atrial arrhythmia recurrence after initial catheter ablation. | Positive |
| Masuda M, et al.62 | 2022 | Retrospective observational study | 402 patients with AF | Electroanatomical mapping + Follow-up for 12 months | Recurrence rates were higher in patients with LVAs than in those without. | Positive |
| Bhatia NK, et al.63 | 2022 | Retrospective observational study | 81 patients with AF | Electroanatomical mapping + Follow-up for 12 months | LVZs are more common in patients at high clinical risk for recurrence. | Positive |
| Mitran RE, et al.64 | 2023 | Prospective, observational, two-center study | 106 patients with AF | Electroanatomic Mapping + follow-up for 12 months | LA-LVAs associated with higher recurrence rates after the RF catheter  ablation procedure. | Positive |
| Chen H, et al.65 | 2023 | Retrospective observational study | 438 patients with AF | Electroanatomical mapping + follow-up for 23 months | Additional low-voltage-area ablation beyond CPVI decreased the ATA recurrence in older patients with paroxysmal AF compared with CPVI alone. | Positive |
| Chieng D, et al.66 | 2023 | Retrospective observational study | 210 patients with AF | Electroanatomical mapping + Follow-up for 12 months | In patients with PsAF undergoing catheter ablation, posterior LVA was associated with a significant increase in atrial arrhythmia recurrence. | Positive |
| Georgi C, et al.67 | 2024 | Prospective observational study | 160 patients with AF | Electroanatomical mapping + Follow-up for 16 ± 11 months | Total LVA percentage has a good predictive power on arrhythmia recurrence. | Positive |
| Qiu B, et al.68 | 2024 | Retrospective observational study | 387 patients with AF | Electroanatomical mapping + Follow-up for 12 months | The combined LA-EAT and LA-LVAs% can effectively predict the risk of AF recurrence after radiofrequency ablation. | Positive |
| Kordić LL, et al.69 | 2024 | Retrospective observational study | 94 patients with AF | Electroanatomical mapping + Follow-up for 12 months | An increase in LAPW low-voltage areas and AF classification were associated with arrhythmia recurrence. | Positive |
| Masuda M, et al.70 | 2024 | Retrospective observational study | 1488 patients with AF | Electroanatomical mapping + Follow-up for 12 months | LVA presence and its extent both were associated with poor long-term composite endpoints of death, heart failure, and stroke, irrespective of AF recurrence or other confounders. | Positive |
| Zhao X, et al.71 | 2024 | Retrospective observational study | 435 patients with persistent AF | Electroanatomical mapping + Follow-up for 6 months | Low voltage zones (LVZs) were found to impact the improvement of left ventricular ejection fraction (LVEF). | Positive |
| Zhou Y, et al.72 | 2022 | Meta-analysis | 16 studies involving 1942 patients | Pooled analysis of studies aimed to evaluate the efficacy of low-voltage area (LVA)-guided substrate modification catheter ablation in patients with atrial fibrillation (AF). | Low-voltage area-guided substrate modification ablation combined with PVI appears to have a significant beneficial effect of improving freedom from all-atrial tachycardia recurrence. | Positive |
| Mao S, et al.73 | 2022 | Meta-analysis | 6 studies, involving 1,175 patients | A systematic search to compare the arrhythmia recurrence in AF patients with and without LVAs after conventional ablation and arrhythmia recurrence in LVAs patients after conventional ablation with and without substrate modification based on LVAs. | LVAs could improve the risk of arrhythmia recurrence in AF patients after conventional ablation. And additional LVAs substrate modification after conventional ablation could increase the freedom of arrhythmia recurrence in LVAs patients. | Positive |
| Moustafa A, et al.27 | 2023 | Meta-analysis | 11 studies, total 1597 patients | Pooled analysis of studies on the role of LVAs substrate modification in AF ablation. | LVA guided substrate modification provides significant reduction in recurrence of all atrial arrhythmias at 1-year compared with non LVA approaches in persistent and longstanding persistent AF population without increase in adverse events. | Positive |
| Zhang W, et al.74 | 2024 | Meta-analysis | 12 studies, total 1070 patients | Pooled analysis of studys aimed to explore the relationship between the presence of pre-ablation LA-LVAs and the risk of recurrent AF after catheter ablation. | The presence of pre-ablation LA-LVAs correlate with the risk of recurrent AF after catheter ablation. | Positive |
